# Supplementary material for: The Role of ARX in Human Pancreatic Endocrine Specification
Source: PubMed Central journal article supplement (PMC4669132; doi:10.1371/journal.pone.0144100), 2015-12-03
Supplement: pone.0144100.s002.pdf [file pone.0144100.s002.pdf]

**S1 Table. RT-qPCR primers**

| Gene Name                 | Gene Accession     | Product Size (bp) | Primer Sequence<br>Forward / Reverse 5'→3'                             | Reference |
|---------------------------|--------------------|-------------------|------------------------------------------------------------------------|-----------|
| HNF4a                     | NM_000457.4        | 212               | TTGCCAACACAATGCCCACT<br>GATAACTTCCTGCTTGGTGATGGTCG                     |           |
| PROX1                     | NM_0012706<br>16.1 | 159               | GTACGCACGTCAAGCCATCA<br>CGTAATGTGATCTGAGCAACTTCCAG                     |           |
| FOXA2                     | NM_021784.4        | 89                | GGGAGCGGTGAAGATGGA<br>TCATGTTGCTCACGGAGGAGTA                           | [1]       |
| SOX9                      | NM_000346.3        | 198               | CCAGAATTCCTTTGGACATTTGTG<br>CTGCTCCATTAGCCAAGGTTG                      |           |
| MNX1                      | NM_005515.3        | 115               | TCGCTCATGCTCACCGAGA<br>CCTTCTGTTTCTCCGTTCT                             | [2]       |
| PDX1                      | NM_000209          | 178               | CGTCCAGCTGCCTTTCCCAT<br>CCGTGAGATGTACTTGGTGAATAGGA                     | [3]       |
| NKX6.1                    | NM_006168          | 186               | GCCCGCCCTGGAGGGACGCA<br>ACGAATAGGCCAAACGAGCCC                          | [3]       |
| NGN3                      | NM_020999          | 286               | AGACGACGCGAAGCTCACC<br>AAGCCAGACTGCCTGGGCT                             | [2]       |
| PAX4                      | NM_006193          | 169               | AGCAGAGGCACTGGAGAAAGAGTT<br>CAGCTGCATTTCCCACTTGAGCTT                   | [3]       |
| ARX                       | NM_139058.2        | 141               | CTGCTGAAACGCAAACAGAGGC<br>CTCGGTCAAGTCCAGCCTCATG                       | [2]       |
| NKX2.2                    | NM_002509          | 221               | CTTCTACGACAGCAGCGACAACCCG<br>CCTTGGAGAAAAGCACTCGCCGCTTT                | [3]       |
| ISL1                      | NM_002202          | 200               | GAGCAGCGGCTCTTTCAGC<br>CCGCAACCAACACATAGGGAAATCAG                      |           |
| PAX6                      | NM_000280          | 130               | AACCAATTCACAACCCACCACAC<br>TTATTTGCCATGGTGAAGCTGGGC                    |           |
| IRX2                      | NM_033267.4        | 153               | CGGCTACGAGCCCAAGAAAG<br>GCAAGTTGGTGCTGGGAGG                            |           |
| HHEX                      | NM_002729.4        | 198               | CATGTTTCAGAAAAGTGGATTTAGGAATAATGT<br>CCTAAGAGCAGTACATAAACTATTTGTTAAGTC |           |
| SOX4                      | NM_003107.2        | 159               | CGTTCTCGTCGTCGGATCAA<br>CAACAACATCAATAACAACAATCAACAGG                  |           |
| NEUROD1                   | NM_002500.2        | 146               | GCCCCAGGGTTATGAGACTAT<br>GAGAAGTGGAGACTCGTCTGT                         | [2]       |
| MAFB                      | NM_005461.3        | 146               | TATAAACCGCTCCAGCAGAAGC<br>CCGGAGTTGGCGAGTTTCTC                         |           |
| MAFA                      | NM_201589          | 195               | CTTCAGCAAGGAGGAGGTCA<br>TTGTACAGTCCCGCTCTTT                            | [2]       |
| PREP1<br>(PKNOX1)         | NM_004571.3        | 161               | GGCTACACAGACATTAAGTATAGACAGC<br>GCTTGTCCACATCCATCGGG                   |           |
| PBX                       | NM_002585.3        | 229               | TTAAACTGCCACAGAATGAAGCCT<br>AGTTGTCTGAACCTGCCCT                        |           |
| PCSK1                     | NM_000439          | 117               | AAGCAAACCCAAATCTCACCTGGC<br>TCACCATCAAGCCTGCTCCATTCT                   |           |
| PCSK2                     | NM_002594          | 162               | AAGATGGCTTTGCAGCAGGAAGGA<br>AGCCACATTCAAATCAAGGCCAGG                   |           |
| Insulin                   | NM_000207.2        | 245               | AGCCTTTGTGAACCAACACC<br>GCTGGTAGAGGGAGCAGATG                           | [4]       |
| Glucagon                  | NM_002054.4        | 275               | CATTCACAGGGCACATTCAC<br>CGGCCAAGTCTTCAACAAT                            | [4]       |
| Somatostatin              | NM_001048.3        | 126               | AGCTGCTGTCTGAACCCAAC<br>CCATAGCCGGGTTTGAGTTA                           | [4]       |
| Pancreatic<br>Polypeptide | NM_002722.3        | 180               | ACCTGCGTGGCTCTGTTACT<br>CAGCGTGCCTCTTGTGTC                             | [4]       |

|         |             |     |                                                     |     |
|---------|-------------|-----|-----------------------------------------------------|-----|
| Ghrelin | NM_016362.3 | 156 | AACACCAGAGAGTCCAGCA<br>CAACATCAAAGGGGGCGTT          |     |
| HPRT    | NM_000194.2 | 148 | TGTTGTAGGATATGCCCTTGACTAT<br>GCGATGTCAATAGGACTCCAGA | [2] |

All primers were optimized for efficient (80-105%) amplification in a 2-step fast PCR reaction with a T<sub>m</sub> of 62°C to generate a single peak during a melt curve and the expected product size.

#### References

1. D'Amour KA, Agulnick AD, Eliazar S et al. Efficient differentiation of human embryonic stem cells to definitive endoderm. **Nat Biotechnol.** 2005;23:1534-1541.
2. Gage BK, Webber TD, Kieffer TJ. Initial Cell Seeding Density Influences Pancreatic Endocrine Development During in vitro Differentiation of Human Embryonic Stem Cells. **PLoS ONE.** 2013;8:e82076.
3. Gage BK, Riedel MJ, Karanu F et al. Cellular reprogramming of human amniotic fluid cells to express insulin. **Differentiation.** 2010;80:130-139.
4. Li WC, Horb ME, Tosh D et al. In vitro transdifferentiation of hepatoma cells into functional pancreatic cells. **Mech Dev.** 2005;122:835-847.
