# Supplementary material for: The Role of ARX in Human Pancreatic Endocrine Specification
Source: PubMed Central journal article supplement (PMC4669132; doi:10.1371/journal.pone.0144100), 2015-12-03
Supplement: pone.0144100.s003.pdf [file pone.0144100.s003.pdf]

**S2 Table. Antibody Sources and Conditions for Immunocytochemistry**

| Gene Name                 | Host Species      | Supplier / Catalogue number    | Staining Method           | Dilution | Antigen Retrieval |
|---------------------------|-------------------|--------------------------------|---------------------------|----------|-------------------|
| CXCR4                     | Mouse<br>IgG2A-PE | R&D Systems<br>FAB170P         | Fixed cell Flow           | 1:50     | None              |
| PDX1                      | Mouse<br>IgG1k-PE | BD Biosciences<br>562161       | Fixed cell Flow           | 1:50     | None              |
| NKX6.1                    | Mouse             | DHSB<br>F55A12                 | Fixed cell Flow           | 1:50     | None              |
| OCT4                      | Goat              | R&D Systems<br>AF1759          | 4% PFA fixed<br>monolayer | 1:500    | None              |
| SSEA3                     | Rat<br>IgM        | R&D Systems<br>MAB1434         | 4% PFA fixed<br>monolayer | 1:250    | None              |
| Insulin                   | Guinea<br>Pig     | Sigma<br>I8510                 | 4% PFA fixed<br>monolayer | 1:500    | None              |
| Glucagon                  | Rabbit            | Cell Signalling<br>8233P       | 4% PFA fixed<br>monolayer | 1:250    | None              |
| Somatostatin              | Mouse             | BCBC<br>AB1985                 | 4% PFA fixed<br>monolayer | 1:500    | None              |
| Chromogranin<br>A         | Sheep             | Biomol International<br>CA1128 | Slide                     | 1:200    | HIER              |
| ARX                       | Rabbit            | Dr. P. Collombat<br>Gift       | Slide                     | 1:500    | HIER              |
| PDX1                      | Guinea<br>Pig     | Abcam<br>Ab47308               | Slide                     | 1:1000   | HIER              |
| PDX1                      | Rabbit            | Dr. J. Habener<br>Gift         | Slide                     | 1:1000   | HIER              |
| NKX6.1                    | Rabbit            | Dr. A. Rezanian<br>Gift        | Slide                     | 1:500    | HIER              |
| PCNA                      | Mouse             | BD Biosciences<br>610665       | Slide                     | 1:100    | HIER              |
| Insulin                   | Guinea<br>Pig     | Sigma<br>I8510                 | Slide                     | 1:1000   | HIER              |
| Glucagon                  | Rabbit            | Cell Signalling<br>8233P       | Slide                     | 1:500    | HIER              |
| Somatostatin              | Mouse             | BCBC<br>AB1985                 | Slide                     | 1:1000   | HIER              |
| Somatostatin              | Rabbit            | Sigma<br>HPA019472             | Slide                     | 1:1000   | HIER              |
| Ghrelin                   | Rabbit            | BioVision<br>5991-100          | Slide                     | 1:200    | HIER              |
| Pancreatic<br>Polypeptide | Goat              | R&D Systems<br>AF6297          | Slide                     | 1:200    | HIER              |
| NKX2.2                    | Mouse             | DHSB<br>74.5A5                 | Slide                     | 1:100    | HIER              |
| PAX6                      | Rabbit            | Covance<br>PRB-278P            | Slide                     | 1:250    | HIER              |
| ISL1                      | Goat              | R&D Systems<br>AF1837          | Slide                     | 1:25     | HIER              |
| PREP1<br>(PKNOX1)         | Rabbit            | Santa Cruz<br>SC-6245          | Slide                     | 1:500    | HIER              |
| PBX1a/1b                  | Rabbit            | Cell Signaling<br>4342         | Slide                     | 1:500    | HIER              |

|           |               |                                 |       |       |      |
|-----------|---------------|---------------------------------|-------|-------|------|
| PC1/3     | Rabbit        | Lakshmi Devi<br>Gift            | Slide | 1:500 | HIER |
| PC2       | Rabbit        | Affinity BioReagents<br>PA1-058 | Slide | 1:500 | HIER |
| C-peptide | Guinea<br>Pig | Abcam<br>Ab30477                | Slide | 1:100 | HIER |
| eGFP      | Mouse         | Clontech<br>632375              | Slide | 1:500 | HIER |

**HIER** (heat induced epitope retrieval): 15 minutes at 95°C in 10 mM Citrate buffer with 0.05% Tween-20 pH 6.0.

**SLIDE:** PFA fixed, paraffin section of agarose embedded cell pellet or pancreatic tissue

**BCBC** (Beta Cell Biology Consortium)

**DHSB** (Developmental Studies Hybridoma Bank), University of Iowa
